# Supplementary material
Source: Springer Nature journal article supplement (https://www.springermedizin.de/resource/supplementary/12876_2014_1194_MOESM2_ESM.pdf/9438304)

**A****Hannover**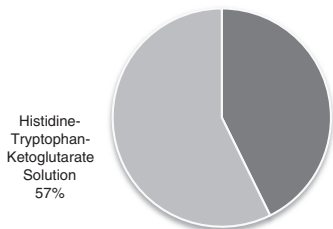**B****Kiel**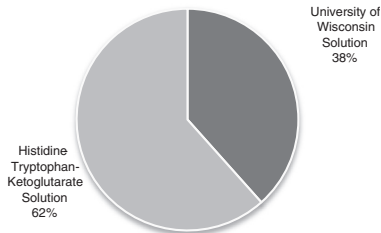**C****Hannover**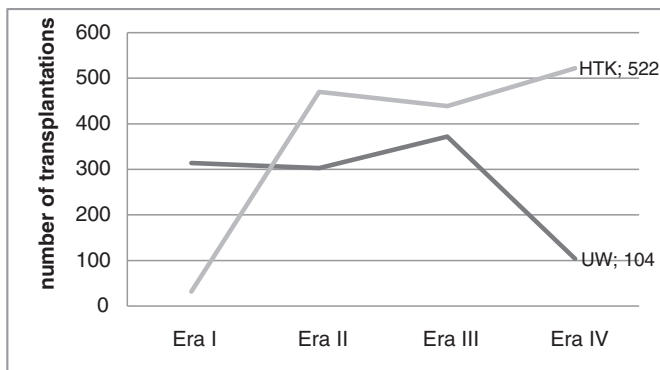**D****Kiel**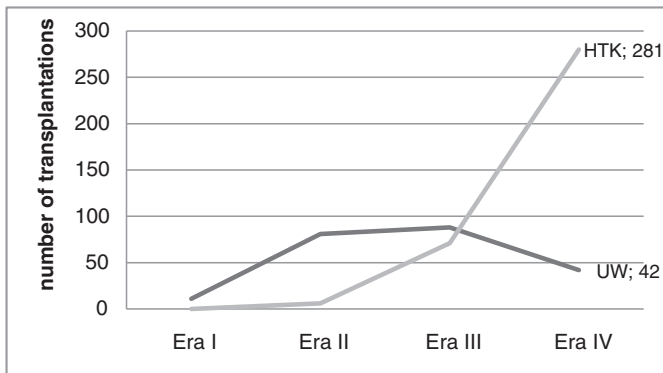

Supplement: MOESM2 [file 9438304]
